# Supplementary material for: Structures and magnetism of cyano-bridged grid-like two-dimensional 4f–3d arrays
Source: Royal Society of Chemistry journal article supplement (doi:10.1039/b603050e), 2006-01-01
Supplement: b603050e.pdf [file b603050e.pdf]

# Structures and magnetism of cyano-bridged grid-like two-dimensional 4f-3d arrays

Yuan-Zhu Zhang,<sup>a</sup> Gong-Ping Duan,<sup>a</sup> Osamu Sato,<sup>b</sup> Song Gao<sup>\*a</sup>

## Supporting Materials

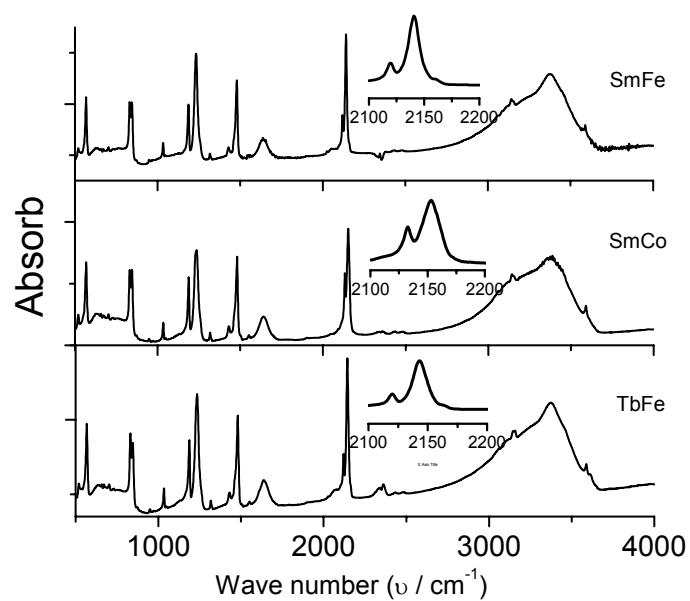

(a)

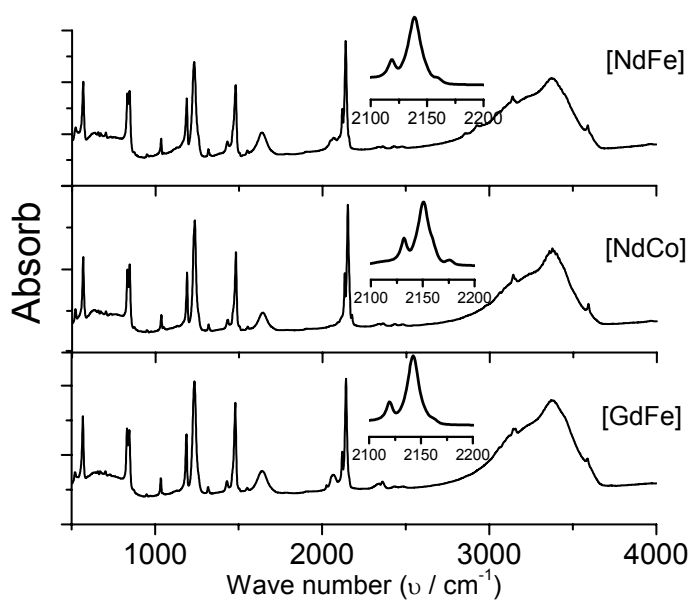

(b)

**Fig. S1** IR spectra for compounds 1-6

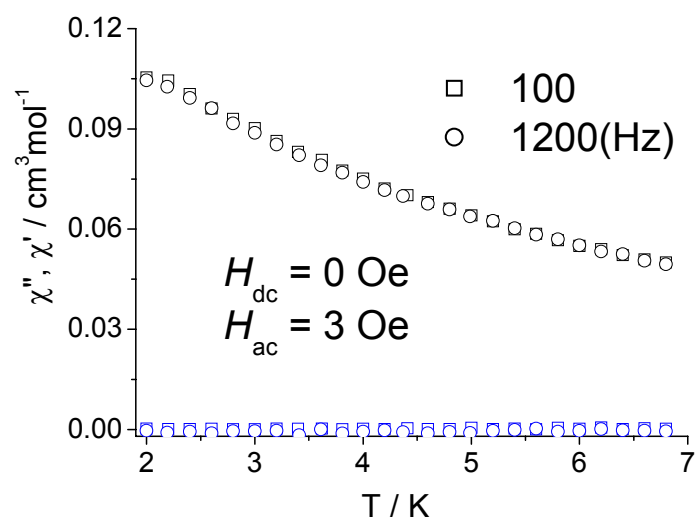

**Fig. S2** Real ( $\chi_M'$ , upper) and imaginary ( $\chi_M''$ , down) *ac* susceptibilities in zero static applied field and an *ac* field of 3 Oe at different frequencies for **5**.
